# Supplementary material for: PknB and STP as Potential Targets of Luteolin in Combating Trueperella pyogenes Infections
Source: Research Square preprint supplement (doi:10.21203/rs.3.rs-5222514/v1), 2025-04-29
Supplement: Supplementary file 1 [file 8704f7338d79eeb501fb00fd.docx]

| **Gene** | **Sequence (5‘-3’)** | **Product Size (bp)** | **Temperature (℃)** |
| --- | --- | --- | --- |
| *pknB* | forward: ATGGCGTCGGTGAGCGAC | 998 | 56.9 |
| reverse: TCAGTGTCCAATCTGTGCGAGA |
| *stp* | forward: CGGGATCCATGGCTGACGTACCCCGAA | 732 | 61 |
| reverse: CCCAAGCTTTCGATTGTGTTTGTTCTCTTCAACCG |

**Table 1.** Primer sequences for PCR used in this study
