# Supplementary material for: PknB and STP as Potential Targets of Luteolin in Combating Trueperella pyogenes Infections
Source: Research Square preprint supplement (doi:10.21203/rs.3.rs-5222514/v1), 2025-04-29
Supplement: Supplementary file 2 [file 9e5da2e9e0ec12906cdb8edc.docx]

| **Gene** | **Sequence (5‘-3’)** | **Product Size (bp)** | **Temperature (℃)** |
| --- | --- | --- | --- |
| *pknB* | forward: TCGACTTCTCACCACTGAACAC | 188 | 56.9 |
| reverse: CTTTCATCAGTGCAAGCGTGA |
| *stp* | forward: TCGTCGTCGGCATCCTGTCC | 112 | 61 |
| reverse: TTGTCTGCGTCATTGTGGCTGAG |
| *gapdh* | forward: CGGCGAAGAACGAGGACATCAC | 153 | 63.5 |
| reverse: GTCGGCAGTGTAGGCGTGAAC |

**Table 2.** Primer sequences for qPCR used in this study
