# Supplementary material for: PknB and STP as Potential Targets of Luteolin in Combating Trueperella pyogenes Infections
Source: Research Square preprint supplement (doi:10.21203/rs.3.rs-5222514/v1), 2025-04-29
Supplement: Supplementary file 3 [file c3f010dd4047e547da029dc3.docx]

| **Gene** | **Sequence (5‘-3’)** | **Product Size (bp)** | **Temperature (℃)** | **Restriction site** |
| --- | --- | --- | --- | --- |
| *pknB* | forward: CGGGATCCATGG  CTGACGTACCCCGAA | 998 | 56.9 | BamH Ⅰ |
| reverse: TAAAGCGGCCG  CTTACGGCCGAACAGATGGCGTA | Hind Ⅲ |
| *stp* | forward: CGGGATCCATGG  CTGACGTACCCCGAA | 732 | 61 | BamH Ⅰ |
| reverse: CCCAAGCTTTCGATTG  TGTTTGTTCTCTTCAACCG | Hind Ⅲ |

**Table 3.** Primer sequences used in the expression of the His-PKNB and His-STP fusion proteins
